# Supplementary material for: Effects of Excessive Activation of N-methyl-D-aspartic Acid Receptors in Neonatal Cardiac Mitochondrial Dysfunction Induced by Intrauterine Hypoxia
Source: Frontiers journal article supplement (doi:10.3389/fcvm.2022.837142), 2022-03-30
Supplement: Data_Sheet_2.pdf [file Data_Sheet_2.pdf]

**Figure 2:** <https://www.jianguoyun.com/p/DanR9uwQINn1CRidrpQE>

**Figure 3:** <https://www.jianguoyun.com/p/DXXXWMwQINn1CRiorpQE>

**Figure 4:** [https://www.jianguoyun.com/p/DTBoy\\_kQINn1CRiqrpQE](https://www.jianguoyun.com/p/DTBoy_kQINn1CRiqrpQE)

**Figure 6:** <https://www.jianguoyun.com/p/DeR0BHwQINn1CRixrpQE>

**Figure 7:** <https://www.jianguoyun.com/p/DQ5MHIEQINn1CRizrpQE>

**Figure 8:** <https://www.jianguoyun.com/p/Dd8YOZwQINn1CRI1rpQE>

**Figure 9:** <https://www.jianguoyun.com/p/DY0L8cUQINn1CRI9rpQE>

**Figure 10:** <https://www.jianguoyun.com/p/DfR92X8QINn1CRjArpQE>

**Figure S1:** <https://www.jianguoyun.com/p/DcDPgYEQINn1CRjCrpQE>

**Figure S2:** <https://www.jianguoyun.com/p/DYkDFfsQINn1CRj-kK4E>
